# Supplementary material for: Production of four Neurospora crassa lytic polysaccharide monooxygenases in Pichia pastoris monitored by a fluorimetric assay
Source: PubMed Central journal article supplement (PMC3500269; doi:10.1186/1754-6834-5-79), 2012-10-26
Supplement: 1754-6834-5-79-S3.pdf [file 1754-6834-5-79-S3.pdf]

10 20 30 40 50  
PMO-01867 MKSSLLVVLVLT AGLAVRDAIA HAIFQQLWVD GVDYGSTCNR LPTSNSPVTN  
60 70 80 90 100  
PMO-01867 VGSRDVVCNA GTRGVSGKCP VKAGGTVTVE MHQQPGDRSC KSEAIGGAHW  
110 120 130 140 150  
PMO-01867 GPVQIYLSKV SDASTADGSS GGWFKIFSDA WSKKSGGRVG DDDNWGTRDL  
160 170 180 190 200  
PMO-01867 NACCGRMDVL IPKDLPSGDY LLRAEALALH TAGQSGGAQF YISCYQITVS  
210 220 230 240 250  
PMO-01867 GGSANYATV KFPGAYRASD PGIQINIHAV VSNYVAPGPA VVAGGVTKQA  
260 270 280 290 300  
PMO-01867 GSGCIGCEST CKVGSSPSAV APGGKPA SGG SDGNAPEVAE PS GGEGSPSA  
310 320 330 340  
PMO-01867 PGACEVAAYG QCGGDQYSGC TQCASGYTCK AVSPPYYSQC APTS

10 20 30 40 50  
PMO-02916 MKTGSILAAL VASASAHTIF QKVS VNGADQ GQLK GIRAPA NNNPVTDVMS  
60 70 80 90 100  
PMO-02916 SDIICNAV TM KDSNVLT VPA GAKVGHFWGH EIGGAAGPND ADNPIAASHK  
110 120 130 140 150  
PMO-02916 GPIMVYLAKV DNAATTGTSG LKWFKVAEAG LSNGKWAVDD LIANNGWSYF  
160 170 180 190 200  
PMO-02916 DMPTCIAPGQ YLMRAELIAL HNAGSQAGA Q FYIGCAQINV TGGGSASPSN  
210 220 230 240 250  
PMO-02916 TVSFPGAYSA SDPGILINIY GSGKTDNGG KPYQIPGPAL FTCPAGG SGG  
260 270 280 290 300  
PMO-02916 SSPAPATTAS TPKPTSASAP KPVSTTASTP KPTNGSGSGT GAAHSTKCGG  
310 320 330 340 350  
PMO-02916 SKPAATTKAS NPQPTNGGNS AVRAAALYGQ CGGKGWTGPT SCASGTCKFS  
PMO-02916 NDWYSQCLP

```

      10      20      30      40      50
PMO-03328 MLPSISLLLA AALGTSAHYT FPKVWANSQT TADWQYVRRR DNWQNNGFVD
      60      70      80      90     100
PMO-03328 NVNSQQIRCF QSTHSPAQST LSVAAGTTIT YGAAPSVYHP GPMQFYLARV
      110     120     130     140     150
PMO-03328 PDGQDINSWT GEGAVWFKIY HEQPTFGSQL TWSSNGKSSF PVKIPSCIKS
      160     170     180     190     200
PMO-03328 GSYLLRAEHI GLHVAQSSGA AQFYISCAQL SITGGGSTEP GANYKVSFPG
      210     220     230
PMO-03328 AYKASDPGIL ININYPVPTS YKNPGPSVFT C

```

```

      10      20      30      40      50
PMO-08760 MRSTLVTGLI AGLLSQAAA HATFQALWVD GADYGSQCAR VPPSNSPVID
      60      70      80      90     100
PMO-08760 VTSNAMRCNT GTSPPVAKKCP VKAGSTVIVE MHQSHPPVPT LTYKQQANDR
      110     120     130     140     150
PMO-08760 SCSSEAIGGA HYG PVLVYMS KVSDAASADG SSGWFKIFED TWAKKPSSSS
      160     170     180     190     200
PMO-08760 GDDDFWGVKD LNSCCGKMQV KIPSDIPAGD YLLRAEVIAL HTAASAGGAQ
      210     220     230     240     250
PMO-08760 LYMTCYQISV TGGGSATPAT VSFPGAYKSS DPGILVDIHS AMSTYVAPGP
      260     270     280     290     300
PMO-08760 AVYSGGSSKK AGSGCVGCES TCKVGSPTG TASAVPFAST SAAAGGGGGG
      310     320     330     340
PMO-08760 GSGGCSVAKY QQCGGTGYTG CTSCASGSTC SAVSPPYYSQ CV

```
